# Supplementary material
Source: publisher figshare collection journal article supplement (https://frontiersin.figshare.com/ndownloader/files/25734884)
Supplement: Supplementary file [file 25734884]

Belonging and Social Integration as Factors of Well-Being in Latin America and Latin Europe Organizations

Frontiers of Psychology

**Silvia da Costa<sup>1\*</sup>, Edurne Martínez-Moreno<sup>1</sup>, Virginia Díaz<sup>1</sup>, Daniel Hermosilla<sup>1</sup>, Alberto Amutio<sup>2</sup>, Sonia Padoan<sup>1</sup>, Doris Méndez<sup>4</sup>, Gabriela Etchebehere<sup>5</sup>, Alejandro Torres<sup>6</sup>, Saioa Telletxea<sup>3</sup> and Silvia García Mazzieri<sup>7</sup>**

<sup>1</sup>Department of Social Psychology, Faculty of Psychology, University of the Basque Country, San Sebastian, Spain

<sup>2</sup>Department of Social Psychology, Faculty of Labour Relations and Social Work, University of the Basque Country, Leioa, Spain

<sup>3</sup>Department of Social Psychology, Faculty of Labour Relations and Social Work, University of the Basque Country, Vitoria, Spain

<sup>4</sup>Department of Psychology, Faculty of Psychology, University of Talca, Talca, Chile

<sup>5</sup>Institute of Psychology, Education and Human Development, Faculty of Psychology, University of the Oriental Republic of Uruguay, Montevideo, Uruguay

<sup>6</sup>Argentine National Defense University, Argentina

<sup>7</sup>Department of Psychology, Regional Faculty of the National Technological University, Trenque Lauquen, Argentina

Corresponding author: Silvia da Costa e-mail: [silviacristina.dacosta@ehu.eus](mailto:silviacristina.dacosta@ehu.eus)

### On line resources 3, Sociodemographic data of the participating sample by country in study 1

#### Socio-demographic variables study 1

| Sample                                                                                   | Age                                                      | Sex<br>Beve<br>l<br>point<br>1 =<br>men,<br>2 =<br>wom<br>en | Civil<br>status                                                                                   | Childr<br>en | Besid<br>es<br>worki<br>ng, do<br>you<br>study? | Study<br>level                                                                                                                                                   | Current<br>sector                                                                  | Yea<br>rs in<br>the<br>sect<br>or         | Job role                                                                                                                                                                                                             |                                                                                                                                                                                                                                                      | Time in<br>your<br>organiz<br>ation (in<br>the<br>moment<br>of the<br>survey,<br>2014)       | Kind of contract                                                                                                                                     | Accordin<br>g to the<br>methodol<br>ogy                                                                                               | Intentio<br>n to stay<br>(in the<br>organizat<br>ion long-<br>term)<br><b>YES</b> |
|------------------------------------------------------------------------------------------|----------------------------------------------------------|--------------------------------------------------------------|---------------------------------------------------------------------------------------------------|--------------|-------------------------------------------------|------------------------------------------------------------------------------------------------------------------------------------------------------------------|------------------------------------------------------------------------------------|-------------------------------------------|----------------------------------------------------------------------------------------------------------------------------------------------------------------------------------------------------------------------|------------------------------------------------------------------------------------------------------------------------------------------------------------------------------------------------------------------------------------------------------|----------------------------------------------------------------------------------------------|------------------------------------------------------------------------------------------------------------------------------------------------------|---------------------------------------------------------------------------------------------------------------------------------------|-----------------------------------------------------------------------------------|
|                                                                                          |                                                          |                                                              |                                                                                                   |              |                                                 |                                                                                                                                                                  |                                                                                    | In the sector                             | At the time of<br>the survey                                                                                                                                                                                         |                                                                                                                                                                                                                                                      |                                                                                              |                                                                                                                                                      |                                                                                                                                       |                                                                                   |
| CHILE<br>Santiago,<br>Valparaíso,<br>south-central<br>region and<br>Osorno<br><br>N =    | 19 to 66<br>years<br><br>M = DT<br>34, =<br>08 11,<br>85 | M =<br>1,66,<br>DT =<br>.47<br>66,4<br>%<br>wom<br>en        | 58%<br>single,<br>33%<br>married,<br>2,3%<br>separated,<br>2,0%<br>divorced,<br>1,5%. 3%<br>nr/dk | 50%<br>YES   | 96%<br>YES                                      | 36,9%<br>High<br>school,<br>24,4%<br>Graduate,<br>17,6%<br>Postgradu<br>ate,<br>16,8%<br>Secondar<br>y studies,<br>< 4%<br>Master's<br>and<br>doctor's<br>degree | 74%<br>Educativ<br>e, 21,3%<br>Social<br>interventi<br>on, 4,1%<br>both<br>sectors | M<br>=<br>DT<br>=<br>10,2<br>3            | 4.5% director /<br>managerial<br>position,<br>46.6%<br>Pedagogue,<br>18%<br>administrative,<br>13.5%<br>Psychologist;<br>7.5% teacher,<br>6% others,<br>2.3% social<br>educator,> 1%<br>lawyer, service<br>assistant | 3.8% director /<br>managerial<br>position.<br>42.7%<br>pedagogue,<br>18%<br>administrative;<br>14.5%<br>Psychologists,<br>9.9%<br>professor;<br>4.6% social<br>educator and<br>others; > 1%<br>cleaning<br>assistant and<br>educational<br>assistant | 10,5% <<br>10 years,<br>>10%, 5<br>years, ><br>80% les<br>than 5<br>years                    | 35% permanent position,<br>13.4% temporary /<br>provisional / substitute;<br>18.4% replacement /<br>interim / substitute, 24%<br>other               | 47%<br>agree,<br>18.9%<br>somewhat<br>agree,<br>14.4<br>strongly<br>agree,<br>10.7%<br>fully<br>agree,<br>4.5% not<br>agree at<br>all | 64,3%                                                                             |
| SPAIN (BC)<br>Alaba/Gazteiz,<br>Bilbao/Bilbo<br>and<br>Guipúzcoa/Gip<br>uzkoa<br><br>N = | 25 to 60<br>years<br><br>M = DT<br>45, =<br>01 9,0<br>7  | M =<br>1,79,<br>DT =<br>.415<br>78,5<br>%<br>wom<br>en       | 67,5%<br>married,<br>23,6%<br>single,<br>4,9%<br>divorced,<br>> 1%<br>separated,<br>3,3%<br>nr/dk | 71%<br>YES   | 73.5%<br>NO                                     | 62%<br>Graduate,<br>30.4%<br>Bachelor'<br>s degree,<br>5.8%<br>Master's<br>degree, ><br>1% PhD                                                                   | 72%<br>Educatio<br>nal, 26%<br>Social<br>interventi<br>on, 2.7%<br>both<br>sectors | M =<br>20,0<br>2,<br>DT<br>=<br>10,2<br>3 | 11.2%<br>Director/Mana<br>gerial position,<br>58.7%<br>Teacher,<br>18.7% social<br>educator, 2.4%<br>Pedagogue,<br>2.4%<br>Administrative<br>; 1.6%<br>Administrative<br>Assistant,                                  | 5.5%<br>Director/Mana<br>gerial position,<br>63.2%<br>Teacher,<br>22.1% Social<br>Educator,<br>1.8%<br>Psychologist,<br>Administrative<br>and Social<br>Worker<br>respectively,                                                                      | 42.4%<br>>10<br>years,<br>63.3% >5<br>years and<br>4.9%<br>incorpora<br>tion year<br>survey. | 70% permanent post;<br>14%<br>temporary/provisional/su<br>bstitute; 10.7%<br>replacement/interim/sub<br>stitute; 3.7% filling<br>vacancy, 1.5% other | 35.2%<br>strongly<br>agree,<br>33%<br>agree,<br>18.6%<br>total<br>agree,<br>11.4%<br>somewhat<br>agree,<br>1.1% do<br>not agree       | 79%                                                                               |

|                                                            |                                                     |                                                      |                                                                                                                                                                                  |                  |             |                                                                                     |                                                                                       |                             |                                                                                                                                                                                                                                    |                                                                                                                                                                                                                                                                      |                                                                                                                                                                              |                                                                                                                                           |                                                                                                                               |     |
|------------------------------------------------------------|-----------------------------------------------------|------------------------------------------------------|----------------------------------------------------------------------------------------------------------------------------------------------------------------------------------|------------------|-------------|-------------------------------------------------------------------------------------|---------------------------------------------------------------------------------------|-----------------------------|------------------------------------------------------------------------------------------------------------------------------------------------------------------------------------------------------------------------------------|----------------------------------------------------------------------------------------------------------------------------------------------------------------------------------------------------------------------------------------------------------------------|------------------------------------------------------------------------------------------------------------------------------------------------------------------------------|-------------------------------------------------------------------------------------------------------------------------------------------|-------------------------------------------------------------------------------------------------------------------------------|-----|
|                                                            |                                                     |                                                      |                                                                                                                                                                                  |                  |             |                                                                                     |                                                                                       |                             | 1.2%<br>Psychologist, ><br>1% Cleaning<br>Assistant,<br>Lawyer, Social<br>Worker 2%<br>others                                                                                                                                      | 1.1%<br>Pedagogue. ><br>1% Cleaning<br>Assistant,<br>Lawyer and<br>Tutor Teacher.<br>1.5% others                                                                                                                                                                     |                                                                                                                                                                              |                                                                                                                                           |                                                                                                                               |     |
| Uruguay<br>Montevideo<br>Interior of the<br>country<br>N = | 22 to 69<br>years<br>M = 43.<br>DT = 56<br>9.7<br>3 | M = 1,91,<br>DT = 91%<br>women<br>and<br>8,8%<br>men | 45%<br>married,<br>21%<br>single,<br>18%<br>divorced,<br>3.6%<br>widowed,<br>3.1%<br>separated,<br>3.3%<br>other<br>(cohabit<br>ation,<br>couple,<br>free<br>union) 6.1<br>nr/dk | 76,8<br>%<br>YES | 60,5%<br>NO | 75,1%<br>Graduate,<br>16,9%<br>Bachelor'<br>s degree,<br>4,8%<br>Master's<br>degree | 90.8%<br>Educatio<br>nal, 1.9%<br>Social<br>interventi<br>on, 7.4%<br>both<br>sectors | M = 18,2<br>3,<br>DT = 9,79 | 8.1 Director<br>(12.6<br>management<br>position),<br>67% Teacher,<br>8.4%<br>Psychologist,<br>1.4%<br>Pedagogue,<br>2.3% Social<br>educator, 1.8%<br>Social worker,<br>1.2%<br>Administrative<br>, 2.1%<br>Assistant; 3%<br>others | 7.2 Director<br>(10.1<br>management<br>position),<br>74.3%<br>Teacher, 7.4%<br>Psychologist,<br>1.2%<br>Pedagogue,<br>1.8% Social<br>Worker, 1.4%<br>Social<br>Educator, less<br>than 1%<br>Administrative<br>and equal<br>Administrative<br>Assistant; 2%<br>others | >10 years<br>with the<br>current<br>organizati<br>on at the<br>time of<br>the<br>survey<br>(2015)<br>(32.7%) ><br>5 years<br>(48.4%),<br>12.6%<br>had<br>joined<br>that year | 78.6% permanent post,<br>15.3%<br>temporary/provisional/su<br>bstitute, 3.3%<br>replacement/interim/sub<br>stitute, less than 1%<br>other | 46%<br>agree;<br>somewhat<br>agree and<br>strongly<br>agree<br>20%<br>respective<br>ly; 9%<br>total<br>agree; 5%<br>not agree | 58% |
